# Supplementary material
Source: Springer Nature journal article supplement (https://www.springermedizin.de/resource/supplementary/12970_2009_126_MOESM2_ESM.pdf/9594410)

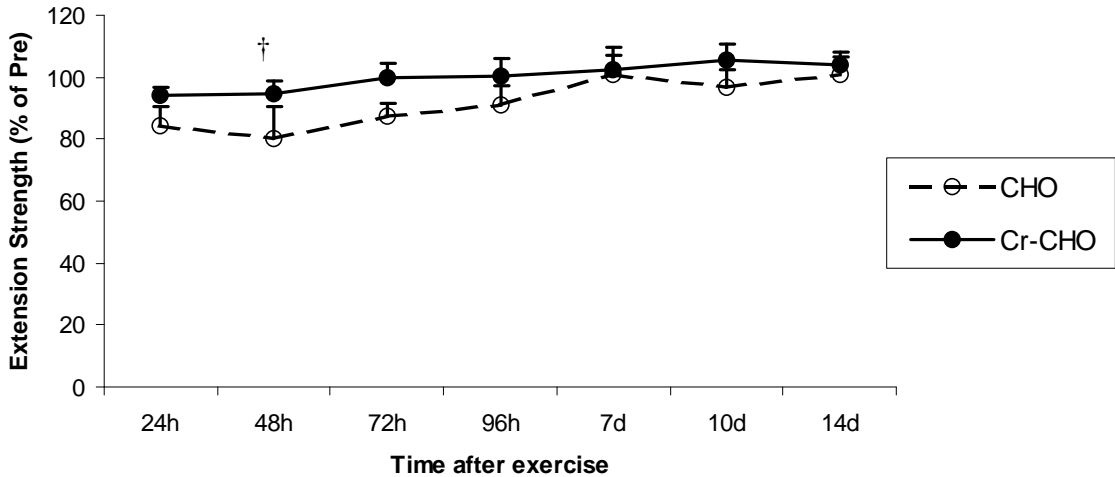

Supplement: MOESM2 [file 9594410]
